# Supplementary material for: Comparison of multiple algorithms to reliably detect structural variants in pears
Source: PubMed Central journal article supplement (PMC6972009; doi:10.1186/s12864-020-6455-x), 2020-01-20

a

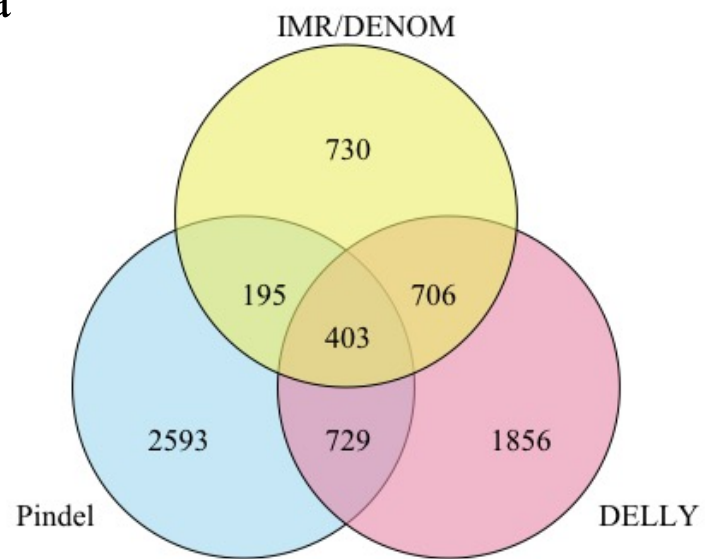

b

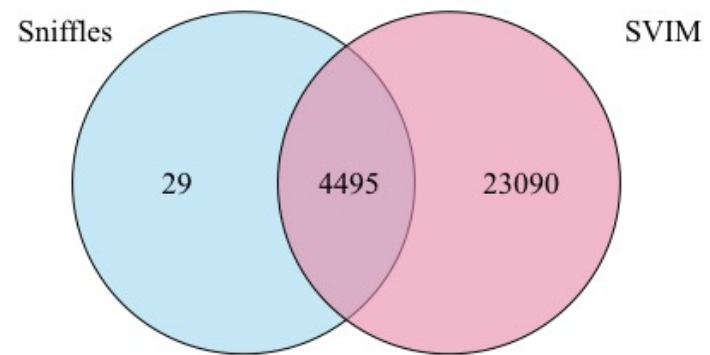

Supplement: 12864_2020_6455_MOESM3_ESM.pdf [file 12864_2020_6455_MOESM3_ESM.pdf]
